# Supplementary material for: The Work Stress Questionnaire (WSQ) – reliability and face validity among male workers
Source: PubMed Central journal article supplement (PMC6882173; doi:10.1186/s12889-019-7940-5), 2019-11-27
Supplement: 12889_2019_7940_MOESM1_ESM.pdf [file 12889_2019_7940_MOESM1_ESM.pdf]

## The Work Stress Questionnaire

---

|                                                                               |                                                                                                                                                                    |
|-------------------------------------------------------------------------------|--------------------------------------------------------------------------------------------------------------------------------------------------------------------|
| <b>01</b> Do you have time to finish your assignments?                        | <input type="checkbox"/> yes, always<br><input type="checkbox"/> yes, rather often<br><input type="checkbox"/> no, seldom<br><input type="checkbox"/> no, never    |
| <b>02</b> Do you have the possibility to influence decisions at work?         | <input type="checkbox"/> yes, always<br><input type="checkbox"/> yes, rather often<br><input type="checkbox"/> no, seldom<br><input type="checkbox"/> no, never    |
| <b>03</b> Does your supervisor consider your views?                           | <input type="checkbox"/> yes, always<br><input type="checkbox"/> yes, rather often<br><input type="checkbox"/> no, seldom<br><input type="checkbox"/> no, never    |
| <b>04</b> Can you decide on your work pace?                                   | <input type="checkbox"/> yes, always<br><input type="checkbox"/> yes, rather often<br><input type="checkbox"/> no, seldom<br><input type="checkbox"/> no, never    |
| <b>05a</b> Has your workload increased?                                       | <input type="checkbox"/> yes<br><input type="checkbox"/> no – if no: go to question <b>06a</b>                                                                     |
| <b>05b</b> If <i>yes</i> : Do you perceive that as stressful?                 | <input type="checkbox"/> not stressful<br><input type="checkbox"/> less stressful<br><input type="checkbox"/> stressful<br><input type="checkbox"/> very stressful |
| <b>06a</b> Are the goals for your workplace clear?                            | <input type="checkbox"/> yes – if <i>yes</i> continue to question <b>07a</b><br><input type="checkbox"/> partly<br><input type="checkbox"/> no                     |
| <b>06b</b> If <i>partly</i> or <i>no</i> : Do you perceive that as stressful? | <input type="checkbox"/> not stressful<br><input type="checkbox"/> less stressful<br><input type="checkbox"/> stressful<br><input type="checkbox"/> very stressful |
| <b>07a</b> Do you know which assignments your work tasks include?             | <input type="checkbox"/> yes – if <i>yes</i> continue to question <b>08a</b><br><input type="checkbox"/> partly<br><input type="checkbox"/> no                     |
| <b>07b</b> If <i>partly</i> or <i>no</i> : Do you perceive that as stressful? | <input type="checkbox"/> not stressful<br><input type="checkbox"/> less stressful<br><input type="checkbox"/> stressful<br><input type="checkbox"/> very stressful |
| <b>08a</b> Do you know who is making decisions concerning your workplace?     | <input type="checkbox"/> yes – if <i>yes</i> continue to question <b>09a</b><br><input type="checkbox"/> partly<br><input type="checkbox"/> no                     |
| <b>08b</b> If <i>partly</i> or <i>no</i> : Do you perceive that as stressful? | <input type="checkbox"/> not stressful<br><input type="checkbox"/> less stressful<br><input type="checkbox"/> stressful<br><input type="checkbox"/> very stressful |
| <b>09a</b> Are there any conflicts at work?                                   | <input type="checkbox"/> yes<br><input type="checkbox"/> no – if <i>no</i> continue to question <b>12a</b>                                                         |
| <b>09b</b> If <i>yes</i> : Do you perceive that as stressful?                 | <input type="checkbox"/> not stressful<br><input type="checkbox"/> less stressful<br><input type="checkbox"/> stressful<br><input type="checkbox"/> very stressful |
| <b>10a</b> Are you involved in any conflicts at your workplace?               | <input type="checkbox"/> yes<br><input type="checkbox"/> no – if <i>no</i> continue to question <b>11a</b>                                                         |
| <b>10b</b> If <i>yes</i> : Do you perceive that as stressful?                 | <input type="checkbox"/> not stressful<br><input type="checkbox"/> less stressful<br><input type="checkbox"/> stressful<br><input type="checkbox"/> very stressful |
| <b>11a</b> Have your supervisor done anything to solve the conflicts?         | <input type="checkbox"/> yes – if <i>yes</i> continue to question <b>12a</b><br><input type="checkbox"/> partly<br><input type="checkbox"/> no                     |
| <b>11b</b> If <i>partly</i> or <i>no</i> : Do you perceive that as stressful? | <input type="checkbox"/> not stressful<br><input type="checkbox"/> less stressful<br><input type="checkbox"/> stressful<br><input type="checkbox"/> very stressful |

---

---

|                                                                                                 |                                                                                                                                                                    |
|-------------------------------------------------------------------------------------------------|--------------------------------------------------------------------------------------------------------------------------------------------------------------------|
| <b>12a</b> Do you put high demands on yourself at work?                                         | <input type="checkbox"/> yes<br><input type="checkbox"/> no – if <i>no</i> continue to question <b>13a</b>                                                         |
| <b>12b</b> If <i>yes</i> : Do you perceive that as stressful?                                   | <input type="checkbox"/> not stressful<br><input type="checkbox"/> less stressful<br><input type="checkbox"/> stressful<br><input type="checkbox"/> very stressful |
| <b>13a</b> Do you often get engaged in your work?                                               | <input type="checkbox"/> yes<br><input type="checkbox"/> no – if <i>no</i> continue to question <b>14a</b>                                                         |
| <b>13b</b> If <i>yes</i> : Do you perceive that as stressful?                                   | <input type="checkbox"/> not stressful<br><input type="checkbox"/> less stressful<br><input type="checkbox"/> stressful<br><input type="checkbox"/> very stressful |
| <b>14a</b> Do you think about work after your working-day?                                      | <input type="checkbox"/> yes<br><input type="checkbox"/> partly<br><input type="checkbox"/> no – if <i>no</i> continue to question <b>15a</b>                      |
| <b>14b</b> If <i>yes</i> or <i>partly</i> : Do you perceive that as stressful?                  | <input type="checkbox"/> not stressful<br><input type="checkbox"/> less stressful<br><input type="checkbox"/> stressful<br><input type="checkbox"/> very stressful |
| <b>15a</b> Do you find it hard to set a limit to work assignment although you have a lot to do? | <input type="checkbox"/> yes<br><input type="checkbox"/> partly<br><input type="checkbox"/> no – if <i>no</i> continue to question <b>16a</b>                      |
| <b>15b</b> If <i>yes</i> or <i>partly</i> : Do you perceive that as stressful?                  | <input type="checkbox"/> not stressful<br><input type="checkbox"/> less stressful<br><input type="checkbox"/> stressful<br><input type="checkbox"/> very stressful |
| <b>16a</b> Do you take more responsibility at work than you ought to?                           | <input type="checkbox"/> yes<br><input type="checkbox"/> no – if <i>no</i> continue to question <b>17a</b>                                                         |
| <b>16b</b> If <i>yes</i> : Do you perceive that as stressful?                                   | <input type="checkbox"/> not stressful<br><input type="checkbox"/> less stressful<br><input type="checkbox"/> stressful<br><input type="checkbox"/> very stressful |
| <b>17a</b> Do you work after ordinary working hours to finish your assignments?                 | <input type="checkbox"/> yes<br><input type="checkbox"/> partly<br><input type="checkbox"/> no – if <i>no</i> continue to question <b>18a</b>                      |
| <b>17b</b> If <i>yes</i> or <i>partly</i> : Do you perceive that as stressful?                  | <input type="checkbox"/> not stressful<br><input type="checkbox"/> less stressful<br><input type="checkbox"/> stressful<br><input type="checkbox"/> very stressful |
| <b>18a</b> Do you find it hard to sleep because your mind is occupied with work?                | <input type="checkbox"/> yes<br><input type="checkbox"/> partly<br><input type="checkbox"/> no – if <i>no</i> continue to question <b>19</b>                       |
| <b>18b</b> If <i>yes</i> or <i>partly</i> : Do you perceive that as stressful?                  | <input type="checkbox"/> not stressful<br><input type="checkbox"/> less stressful<br><input type="checkbox"/> stressful<br><input type="checkbox"/> very stressful |
| <b>19</b> Due to work, do you find it hard to find time to be with your nearest?                | <input type="checkbox"/> yes, always<br><input type="checkbox"/> yes, rather often<br><input type="checkbox"/> no, seldom<br><input type="checkbox"/> no, never    |
| <b>20</b> Due to work, do you find it hard to find time to be with your friends?                | <input type="checkbox"/> yes, always<br><input type="checkbox"/> yes, rather often<br><input type="checkbox"/> no, seldom<br><input type="checkbox"/> no, never    |
| <b>21</b> Due to work, do you find it hard to find time for your recreational activities?       | <input type="checkbox"/> yes, always<br><input type="checkbox"/> yes, rather often<br><input type="checkbox"/> no, seldom<br><input type="checkbox"/> no, never    |

---
